# Supplementary material
Source: HighWire-hosted journal article supplement (https://bmjopen.bmj.com/content/9/5/e027372)
Supplement: inline-supplementary-material-1 [file inline-supplementary-material-1.pdf]

## Search strategies for placebo response intra-articular corticosteroid injections in knee and/or hip OA

### Pubmed (Medline): 299 hits (30-09-2018)

((arthrit\*[tw] OR arthros\*[tw] OR arthrot\*[tw] OR osteoarthro\*[tw] OR osteoarthritis\*[tw] OR osteoporos\*[tw] OR boneloss\*[tw] OR bone-loss\*[tw] OR osteopen\*[tw]) AND (hip[tw] OR hips[tw] OR knee[tw] OR knees[tw])) OR coxarthr\*[tw] OR cox-arthr\*[tw] OR gonarthr\*[tw] OR gonarthr\*[tw]) AND (adrenal cortex hormones[mesh] OR adrenal cortex hormone\*[tw] OR adrenal cortical hormone\*[tw] OR adrenal cortical steroid\*[tw] OR adrenal steroid\*[tw] OR adrenocortical hormone\*[tw] OR adrenocortical steroid\*[tw] OR adrenocorticosteroid\*[tw] OR adrenocorticosteroid\*[tw] OR corticosteroid\*[tw] OR cortico-steroid[tw] OR cortico-steroid[tw] OR corticoid\*[tw] OR corticosteroid\*[tw] OR cortico-steroid\*[tw] OR dermocorticosteroid\*[tw] OR glucocortic\*[tw] OR hydroxycorticosteroid\*[tw] OR ketosteroid\*[tw] OR androstenedion\*[tw]) OR triamcinolone acetonide\*[tw] OR betamethasone acetate\*[tw] OR extended release\*[tw] AND (intraartic\*[tw] OR intra-artic\*[tw]) AND inject\*[tw] AND ((randomized controlled trial[pt] OR controlled clinical trial[pt] OR randomized controlled trials[mh] OR random allocation[mh] OR double-blind method[mh] OR single-blind method[mh] OR clinical trial[pt] OR clinical trials[mh] OR ("clinical trial"[tw]) OR ((singl\*[tw] OR doubl\*[tw] OR tripl\*[tw]) AND (mask\*[tw] OR blind\*[tw])) OR ("latin square"[tw]) OR placebos[mh] OR placebo\*[tw] OR random\*[tw] OR research design[mh:noexp] OR comparative study[pt] OR evaluation studies[pt] OR follow-up studies[mh] OR prospective studies[mh] OR crossover studies[mh] OR control[tw] OR controls[tw] OR controlled[tw] OR controled[tw] OR prospectiv\*[tw] OR volunteer\*[tw]) NOT (animals[mh] NOT humans[mh])) NOT (case report\*[tw] OR retrospect\*[tw] OR cadaver\*[tw]))

### Web of Science – 383 hits (30-09-2018)

(((((hip OR hips OR knee OR knees) NEAR/3 (arthrit\* OR arthros\* OR arthrot\* OR osteoarthro\* OR osteoarthritis\*)) OR coxarthro\* OR (cox NEAR/1 arthro\*) OR gonarthro\* OR (gon NEAR/1 arthro\*)) AND (adrenocorticosteroid\* OR corticoid\* OR corticosteroid\* OR dermocorticosteroid\* OR glucocortic\* OR hydroxycorticosteroid\* OR ketosteroid\* OR triamcinolone acetonide\* OR betamethasone acetate\* OR extended release\* OR androstenedion\* OR (adrenal OR adrenocortical OR adreno OR cortical OR cortico) NEAR/3 (hormone\* OR steroid\* OR corticosteroid\*)) AND ((intraartic\* OR (intra NEAR/1 artic\*)) AND inject\*) AND (randomi\* OR ((singl\* OR doubl\* OR tripl\*) NEAR/3 (mask\* OR blind\*)) OR "latin square" OR "crossover procedure" OR control\* OR prospectiv\* OR volunteer\* OR placebo\* OR "comparative study" OR "evaluation research" OR "follow up") NOT (animal\* NOT human\*) NOT ((case NEAR/1 report\*) OR retrospect\* OR cadaver\*))

**Embase – 558 hits (30-09-2018)**

|           | <b>Searches</b>                                                                                                                                                                                                                                                                                                                                                                                                                                                                                          |
|-----------|----------------------------------------------------------------------------------------------------------------------------------------------------------------------------------------------------------------------------------------------------------------------------------------------------------------------------------------------------------------------------------------------------------------------------------------------------------------------------------------------------------|
| <b>1</b>  | ((hip or hips or knee or knees) adj5 (arthrit* or arthros* or arthrot* or osteoarthro* or osteoarthrit*)) or coxarthro* or (cox adj5 arthro*) or gonarthro* or (gon adj5 arthro*).mp. [mp=title, abstract, heading word, drug trade name, original title, device manufacturer, drug manufacturer, device trade name, keyword, floating subheading word, candidate term word]                                                                                                                             |
| <b>2</b>  | corticosteroid/ or ((adrenocorticosteroid* or corticoid* or corticosteroid* or dermocorticosteroid* or glucocortic* or hydroxycorticosteroid* or ketosteroid* or androstenedion* or triamcinolone acetonide* or betamethasone acetate* or (adrenal or adrenocortical or adreno or cortical or cortico)) adj5 (hormone* or steroid* or corticosteroid*)).mp.                                                                                                                                              |
| <b>3</b>  | (intraartic* or (intra adj5 artic*)).mp. [mp=title, abstract, heading word, drug trade name, original title, device manufacturer, drug manufacturer, device trade name, keyword, floating subheading word, candidate term word]                                                                                                                                                                                                                                                                          |
| <b>4</b>  | inject*.mp.                                                                                                                                                                                                                                                                                                                                                                                                                                                                                              |
| <b>5</b>  | (random* or (clinical adj5 trial*) or ((singl* or doubl* or tripl*) adj5 (mask* or blind*)) or latin square or crossover procedure or control* or prospectiv* or volunteer* or placebo*).mp. or comparative study/ or evaluation research/ or 'follow up'.mp. or followup:ti,ab,de.mp. or 'prospective study'/syn [mp=title, abstract, heading word, drug trade name, original title, device manufacturer, drug manufacturer, device trade name, keyword, floating subheading word, candidate term word] |
| <b>6</b>  | 3 or 4                                                                                                                                                                                                                                                                                                                                                                                                                                                                                                   |
| <b>7</b>  | 2 and 6                                                                                                                                                                                                                                                                                                                                                                                                                                                                                                  |
| <b>8</b>  | 1 and 5 and 7                                                                                                                                                                                                                                                                                                                                                                                                                                                                                            |
| <b>9</b>  | ((case adj5 report*) or retrospect* or cadaver*).mp.                                                                                                                                                                                                                                                                                                                                                                                                                                                     |
| <b>10</b> | 8 not 9                                                                                                                                                                                                                                                                                                                                                                                                                                                                                                  |
| <b>11</b> | limit 10 to human                                                                                                                                                                                                                                                                                                                                                                                                                                                                                        |

**Cochrane Central – 163 hits (30-09-2018)**

|          | <b>Searches</b>                                                                                                                                                                                                                                                                                                                       |
|----------|---------------------------------------------------------------------------------------------------------------------------------------------------------------------------------------------------------------------------------------------------------------------------------------------------------------------------------------|
| <b>1</b> | ((hip or hips or knee or knees) adj5 (arthrit* or arthros* or arthrot* or osteoarthro* or osteoarthrit*)) or coxarthro* or (cox adj5 arthro*) or gonarthro* or (gon adj5 arthro*).mp.                                                                                                                                                 |
| <b>2</b> | exp adrenal cortex hormones/                                                                                                                                                                                                                                                                                                          |
| <b>3</b> | (adrenocorticosteroid* or corticoid* or corticosteroid* or dermocorticosteroid* or glucocortic* or hydroxycorticosteroid* or ketosteroid* or triamcinolone acetonide* or betamethasone acetate* androstenedion* or ((adrenal or adrenocortical or adreno or cortical or cortico) adj5 (hormone* or steroid* or corticosteroid*))).mp. |
| <b>4</b> | ((intraartic* or (intra adj5 artic*)) and inject*).mp                                                                                                                                                                                                                                                                                 |
| <b>5</b> | 2 or 3                                                                                                                                                                                                                                                                                                                                |
| <b>6</b> | 1 and 4 and 5                                                                                                                                                                                                                                                                                                                         |

## Search strategies for placebo response intra-articular hyaluronic acid/viscosupplementation injections in knee and/or hip OA

### Pubmed (Medline): 776 hits (30-09-2018)

((arthrit\*[tw] OR arthros\*[tw] OR arthrot\*[tw] OR osteoarthro\*[tw] OR osteoarthritis\*[tw] OR osteoporosis\*[tw] OR bone loss\*[tw] OR bone-loss\*[tw] OR osteopenia\*[tw]) AND (hip[tw] OR hips[tw] OR knee[tw] OR knees[tw])) OR coxarthrosis\*[tw] OR cox-arthritis\*[tw] OR gonarthrosis\*[tw] OR gonarthrosis\*[tw]) AND (hyaluronic acid\*[tw] OR viscosupplementation\*[tw] OR hyaluronate\*[tw] OR hyaluron\*[tw] OR hylan\*[tw] OR synvisc\*[tw] OR orthovisc\*[tw] OR ostenil\*[tw] OR suplasyn\*[tw] OR arthrum\*[tw] OR synovial\*[tw] OR artz\*[tw] OR biotry\*[tw] OR go-on\*[tw] OR healon\*[tw] OR hyject\*[tw] OR hyalgan\*[tw] OR hyalart\*[tw] OR hyalectin\*[tw] OR nuflexxa\*[tw] OR euflexxa\*[tw] OR polireumin\*[tw] OR hygag\*[tw] OR replasyn\*[tw] OR supartz\*[tw] OR artzal\*[tw] OR nrd101\*[tw] AND (intraarticular\*[tw] OR intra-articular\*[tw]) AND inject\*[tw]) AND ((randomized controlled trial[pt] OR controlled clinical trial[pt] OR randomized controlled trials[mh] OR random allocation[mh] OR double-blind method[mh] OR single-blind method[mh] OR clinical trial[pt] OR clinical trials[mh] OR ("clinical trial"[tw]) OR ((singl\*[tw] OR doubl\*[tw] OR tripl\*[tw]) AND (mask\*[tw] OR blind\*[tw])) OR ("latin square"[tw]) OR placebos[mh] OR placebo\*[tw] OR random\*[tw] OR research design[mh:noexp] OR comparative study[pt] OR evaluation studies[pt] OR follow-up studies[mh] OR prospective studies[mh] OR cross-over studies[mh] OR control[tw] OR controls[tw] OR controlled[tw] OR controled[tw] OR prospectiv\*[tw] OR volunteer\*[tw]) NOT (animals[mh] NOT humans[mh])) NOT (case report\*[tw] OR retrospect\*[tw] OR cadaver\*[tw]))

### Web of Science – 596 hits (30-09-2018)

(((((hip OR hips OR knee OR knees) NEAR/3 (arthrit\* OR arthros\* OR arthrot\* OR osteoarthro\* OR osteoarthritis\*)) OR coxarthro\* OR (cox NEAR/1 arthro\*) OR gonarthro\* OR (gon NEAR/1 arthro\*)) AND (hyaluronic acid\* OR viscosupplementation\* OR hyaluronate\* OR hyaluron\* OR hylan\* OR synvisc\* OR orthovisc\* OR ostenil\* OR suplasyn\* OR arthrum\* OR synovial\* OR artz\* OR biotry\* OR go-on\* OR healon\* OR hyject\* OR hyalgan\* OR hyalart\* OR hyalectin\* OR nuflexxa\* OR euflexxa\* OR polireumin\* OR hygag\* OR replasyn\* OR supartz\* OR artzal\* OR nrd101\*) AND ((intraarticular\* OR (intra NEAR/1 artic\*)) AND inject\*) AND (randomi\* OR ((singl\* OR doubl\* OR tripl\*) NEAR/3 (mask\* OR blind\*)) OR "latin square" OR "crossover procedure" OR control\* OR prospectiv\* OR volunteer\* OR placebo\* OR "comparative study" OR "evaluation research" OR "follow up") NOT (animal\* NOT human\*) NOT ((case NEAR/1 report\*) OR retrospect\* OR cadaver\*))

**Embase – 1209 hits (30-09-2018)**

|           | <b>Searches</b>                                                                                                                                                                                                                                                                                                                                                                                                                                                                                                                                                                                                                                    |
|-----------|----------------------------------------------------------------------------------------------------------------------------------------------------------------------------------------------------------------------------------------------------------------------------------------------------------------------------------------------------------------------------------------------------------------------------------------------------------------------------------------------------------------------------------------------------------------------------------------------------------------------------------------------------|
| <b>1</b>  | ((hip or hips or knee or knees) adj5 (arthrit* or arthros* or arthrot* or osteoarthro* or osteoarthritis*)) or coxarthro* or (cox adj5 arthro*) or gonarthro* or (gon adj5 arthro*).mp. [mp=title, abstract, heading word, drug trade name, original title, device manufacturer, drug manufacturer, device trade name, keyword, floating subheading word, candidate term word]                                                                                                                                                                                                                                                                     |
| <b>2</b>  | hyaluronic acid/ or viscosupplementation*.mp. or hyaluronate*.mp. or hyaluron*.mp. or hylan*.mp. or synvisc*.mp. or orthovisc*.mp. or ostenil.mp. or suplasyn*.mp. or arthrum*.mp. or synovial*OR artz*.mp. or biotty*.mp. or go-on*.mp. or healon*.mp. or hyaject*.mp. or hyalgan*.mp. or hyalart*.mp. or hyalectin*.mp. or nuflexxa*.mp. or euflexxa*.mp. or polireumin*.mp. or hygag*.mp. or replasyn*.mp. or supartz*.mp. or artzal*.mp. or nrd101*.mp. [mp=title, abstract, heading word, drug trade name, original title, device manufacturer, drug manufacturer, device trade name, keyword, floating subheading word, candidate term word] |
| <b>3</b>  | (intraartic* or (intra adj5 artic*)).mp. [mp=title, abstract, heading word, drug trade name, original title, device manufacturer, drug manufacturer, device trade name, keyword, floating subheading word, candidate term word]                                                                                                                                                                                                                                                                                                                                                                                                                    |
| <b>4</b>  | inject*.mp.                                                                                                                                                                                                                                                                                                                                                                                                                                                                                                                                                                                                                                        |
| <b>5</b>  | (random* or (clinical adj5 trial*) or ((singl* or doubl* or tripl*) adj5 (mask* or blind*)) or latin square or crossover procedure or control* or prospectiv* or volunteer* or placebo*).mp. or comparative study/ or evaluation research/ or 'follow up'.mp. or followup:ti,ab,de.mp. or 'prospective study'/syn [mp=title, abstract, heading word, drug trade name, original title, device manufacturer, drug manufacturer, device trade name, keyword, floating subheading word, candidate term word]                                                                                                                                           |
| <b>6</b>  | 3 or 4                                                                                                                                                                                                                                                                                                                                                                                                                                                                                                                                                                                                                                             |
| <b>7</b>  | 2 and 6                                                                                                                                                                                                                                                                                                                                                                                                                                                                                                                                                                                                                                            |
| <b>8</b>  | 1 and 5 and 7                                                                                                                                                                                                                                                                                                                                                                                                                                                                                                                                                                                                                                      |
| <b>9</b>  | ((case adj5 report*) or retrospect* or cadaver*).mp.                                                                                                                                                                                                                                                                                                                                                                                                                                                                                                                                                                                               |
| <b>10</b> | 8 not 9                                                                                                                                                                                                                                                                                                                                                                                                                                                                                                                                                                                                                                            |
| <b>11</b> | limit 10 to human                                                                                                                                                                                                                                                                                                                                                                                                                                                                                                                                                                                                                                  |

**Cochrane Central – 377 hits (30-09-2018)**

|          | <b>Searches</b>                                                                                                                                                                                                                                                                                                                                                                                                                                             |
|----------|-------------------------------------------------------------------------------------------------------------------------------------------------------------------------------------------------------------------------------------------------------------------------------------------------------------------------------------------------------------------------------------------------------------------------------------------------------------|
| <b>1</b> | ((hip or hips or knee or knees) adj5 (arthrit* or arthros* or arthrot* or osteoarthro* or osteoarthritis*)) or coxarthro* or (cox adj5 arthro*) or gonarthro* or (gon adj5 arthro*).mp.                                                                                                                                                                                                                                                                     |
| <b>2</b> | hyaluronic acid/ or viscosupplementation*.mp. or hyaluronate*.mp. or hyaluron*.mp. or hylan*.mp. or synvisc*.mp. or orthovisc*.mp. or ostenil.mp. or suplasyn*.mp. or arthrum*.mp. or synovial*OR artz*.mp. or biotty*.mp. or go-on*.mp. or healon*.mp. or hyaject*.mp. or hyalgan*.mp. or hyalart*.mp. or hyalectin*.mp. or nuflexxa*.mp. or euflexxa*.mp. or polireumin*.mp. or hygag*.mp. or replasyn*.mp. or supartz*.mp. or artzal*.mp. or nrd101*.mp. |
| <b>3</b> | ((intraartic* or (intra adj5 artic*)) and inject*).mp                                                                                                                                                                                                                                                                                                                                                                                                       |
| <b>4</b> | 1 and 2 and 3                                                                                                                                                                                                                                                                                                                                                                                                                                               |
